# Supplementary material for: Core–shell TiO2−x-CuyO microspheres for photogeneration of cyclic carbonates under simulated sunlight
Source: Royal Society of Chemistry journal article supplement (doi:10.1039/d1nr08023g), 2022-01-01
Supplement: d1nr08023g1.pdf [file d1nr08023g1.pdf]

Supporting Information

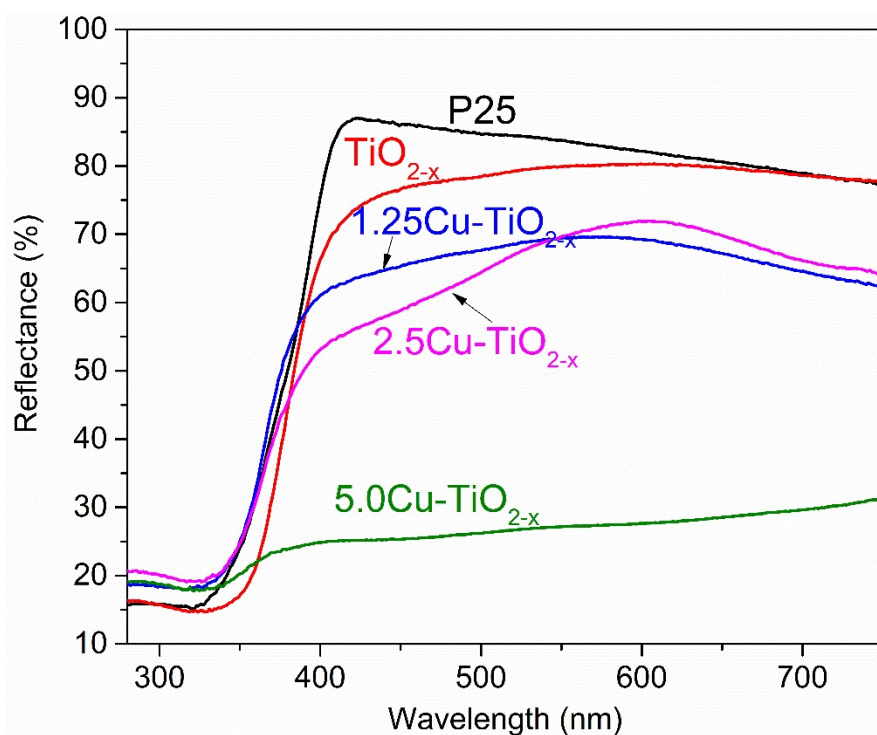

Fig. S1. Diffused reflectance of the fabricated samples and P25.

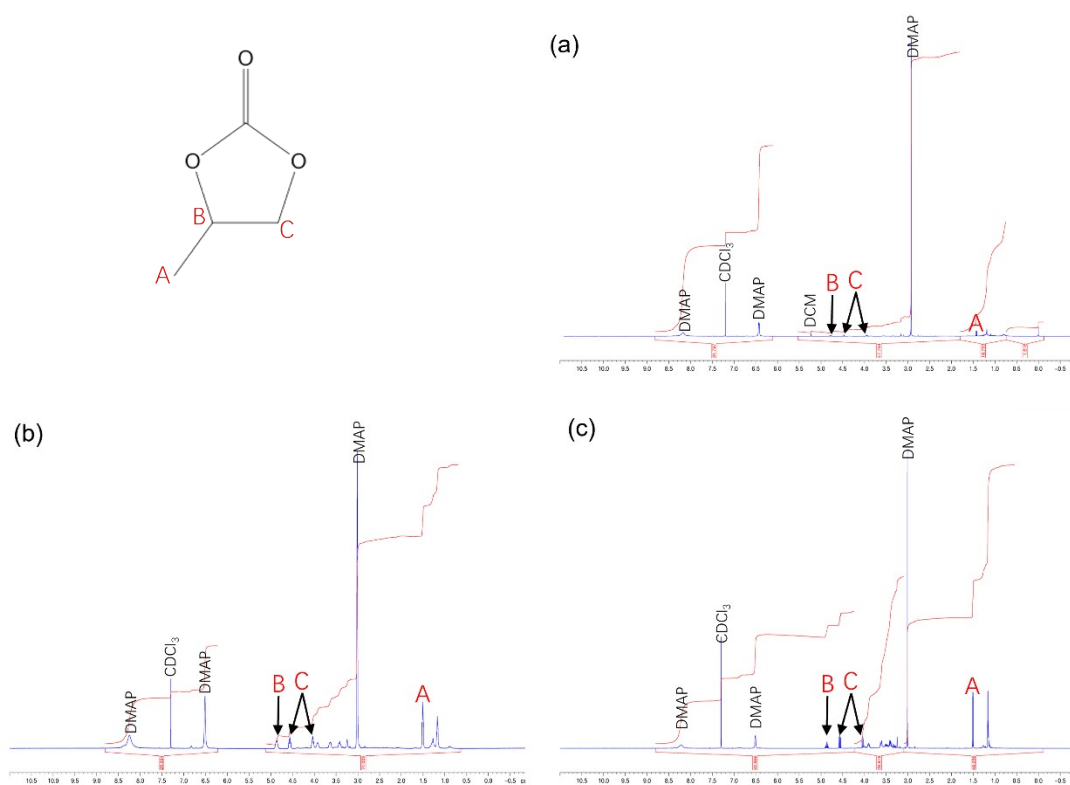

Fig. S2. <sup>1</sup>H NMR pattern of the product obtained after the photocatalytic reaction using TC-12.5

(a), TC-25 (b), and TC-50 (c).

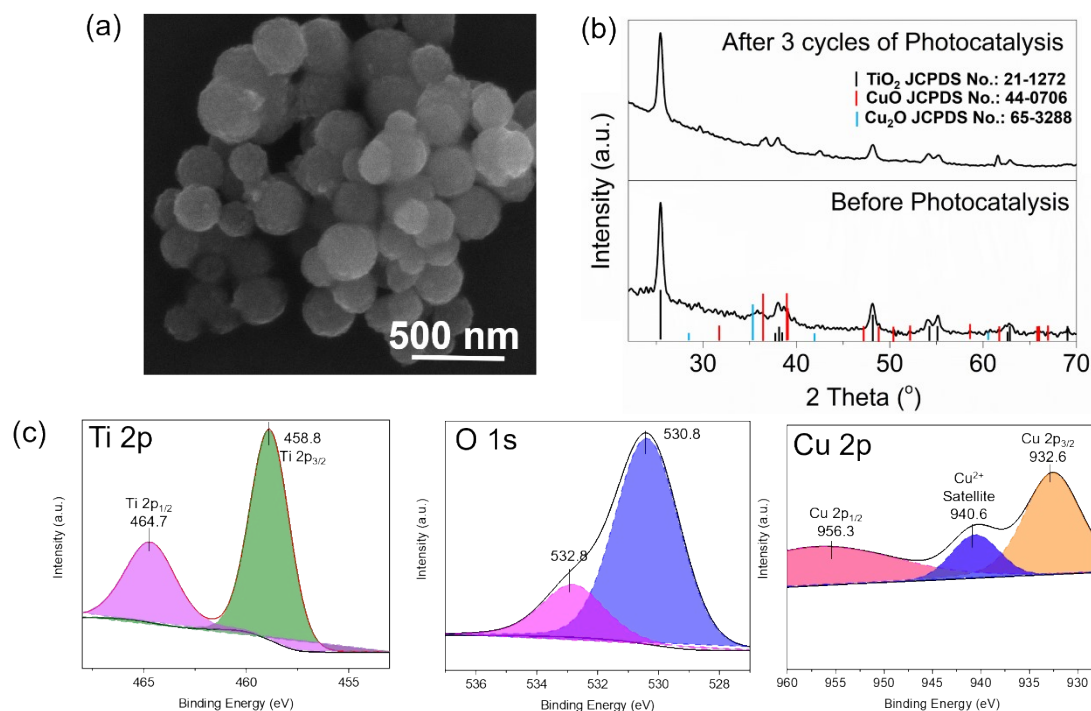

**Fig. S3.** SEM, XRD and XPS of TC-25 after 3 cycles of photocatalytic production PC.

The recycling test of the optimised sample TC-25 revealed 100% selectivity with ~5% decrement in the production of PC after 3 cycles (~1.5 wt%) compared to the TC-25 after 1 cycle (Table 1). The deterioration in production was very likely due to the loss of catalyst during catalyst recovery process. The crystallinity and crystal phase of TC-25 before and after 3 cycles of photocatalysis revealed slight changes, in which the crystallinity of Cu<sub>2</sub>O increased whereas CuO phase disappeared after 3 cycles. The change observed was probably attributed to the reduction of CuO into Cu<sub>2</sub>O moiety under pressurized system in the presence of propylene oxide, which was converted into propylene carbonate.<sup>1</sup> The oxidation state of Ti 2p after 3 cycles of photocatalysis did not show significantly change. However, the satellite peak of Cu<sup>2+</sup> was shifted to lower binding energy (940.6 eV) compared to fresh TC-25 sample (942.1 eV, Figure 3C-c), indicating the chemical shift to lower oxidation state. This observation again evidenced the CuO moiety was being reduced after the photocatalysis in propylene oxide.

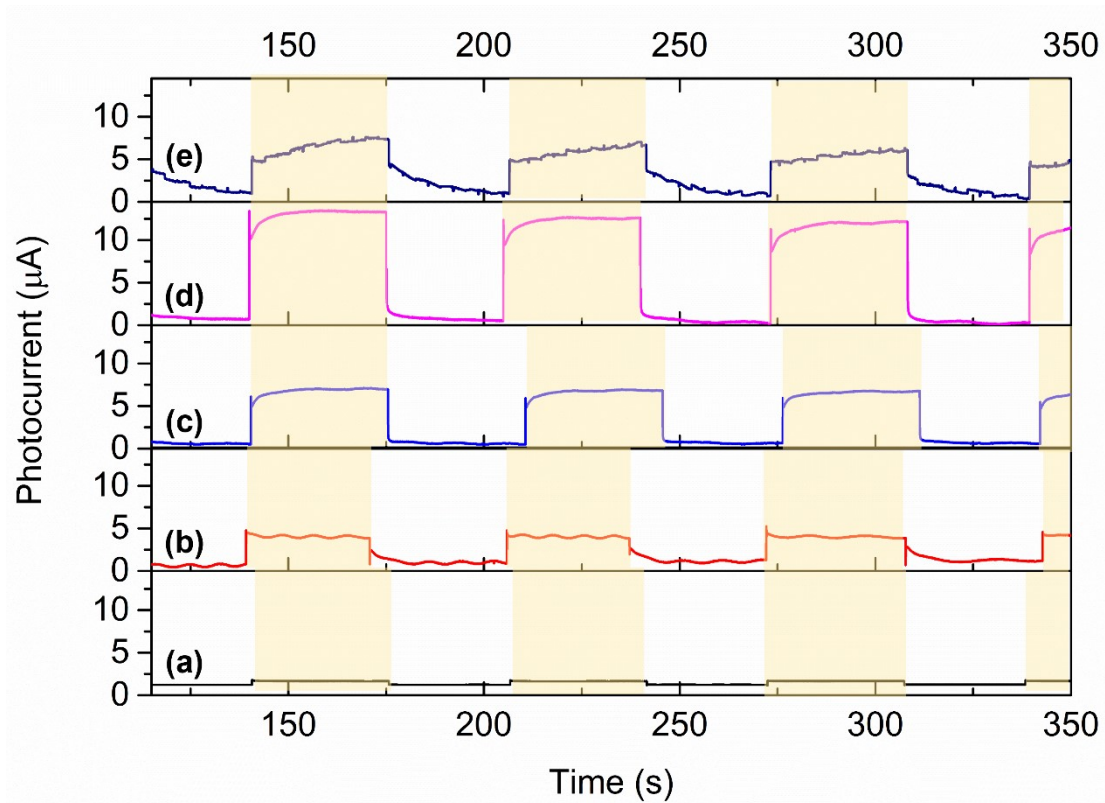

**Fig. S4.** Chronoamperometric measurement of P25 (a),  $\text{TiO}_{2-x}$  (b), TC-12.5 (c), TC-25 (d), and TC-50 (e).

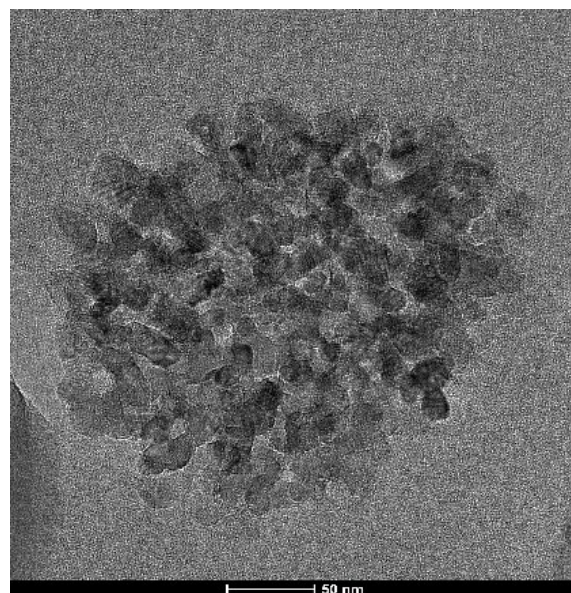

**Fig. S5.** TEM image of  $\text{TiO}_{2-x}$ .

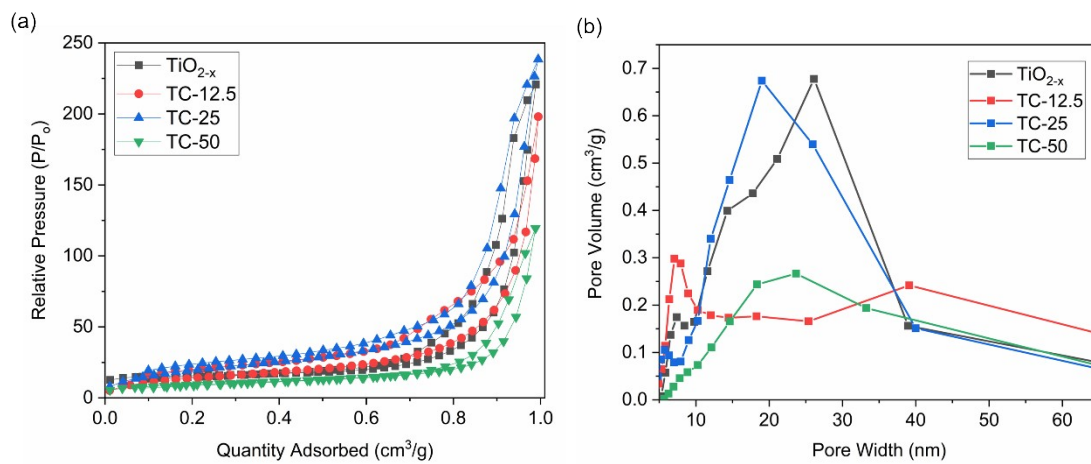

**Fig. S6.** Isotherm and pore size distribution of the fabricated samples.

### Reference

1. J. B. Reitz and E. I. Solomon, *J. Am. Chem. Soc.*, 1998, **120**, 11467-11478.
